# Supplementary material
Source: publisher figshare collection journal article supplement (https://gsapubs.figshare.com/articles/dataset/_/15152583)

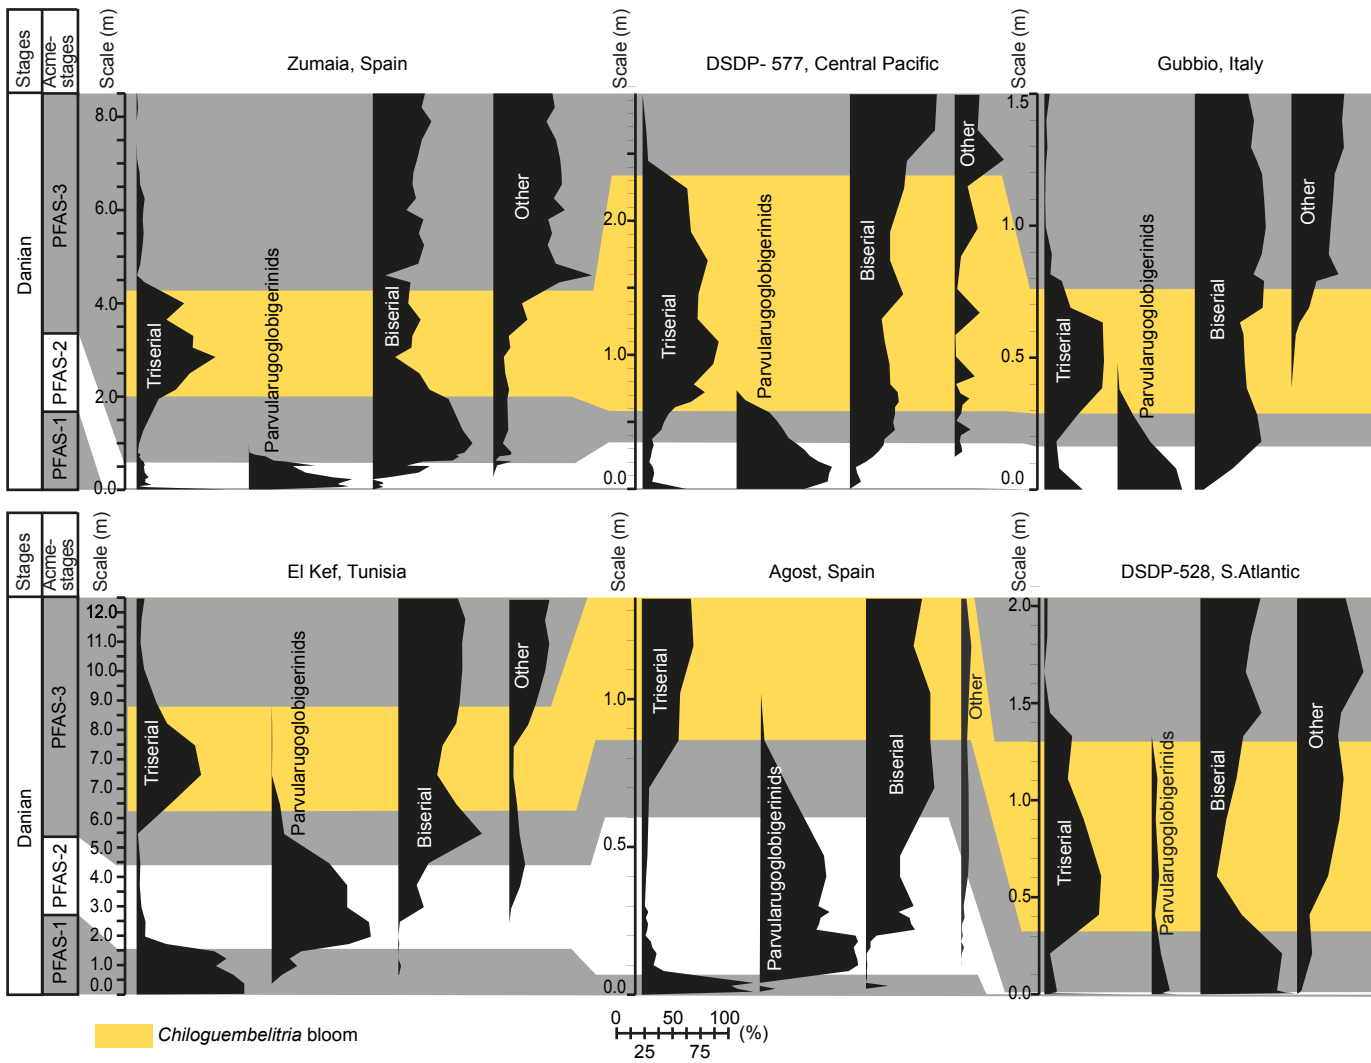

Supplement: Supplementary file 1 [file 2]

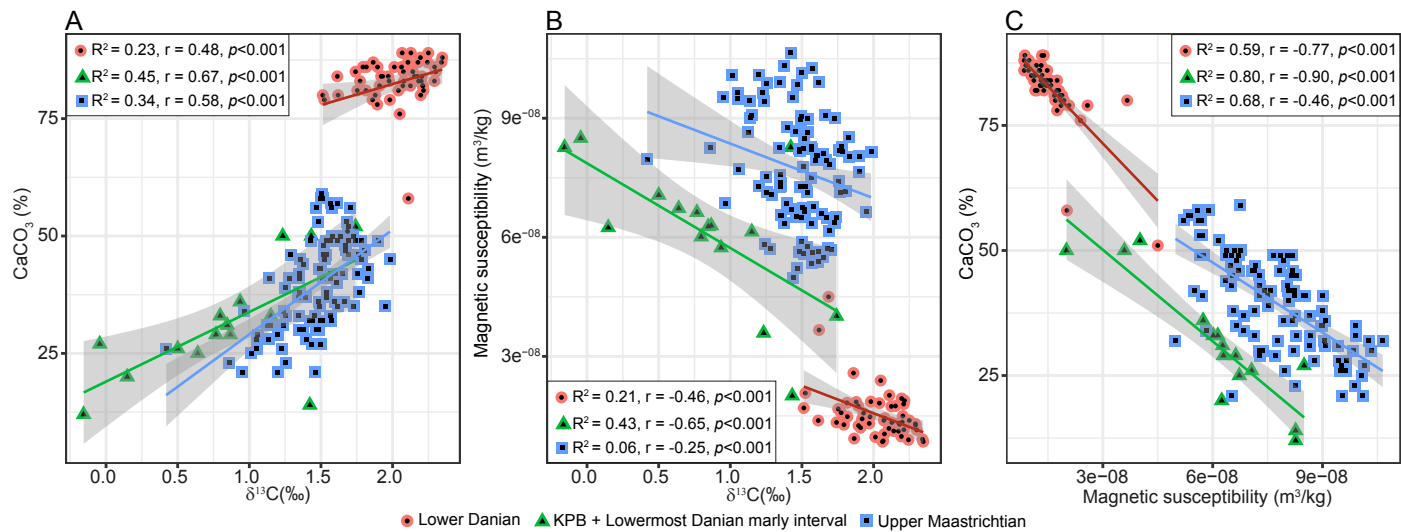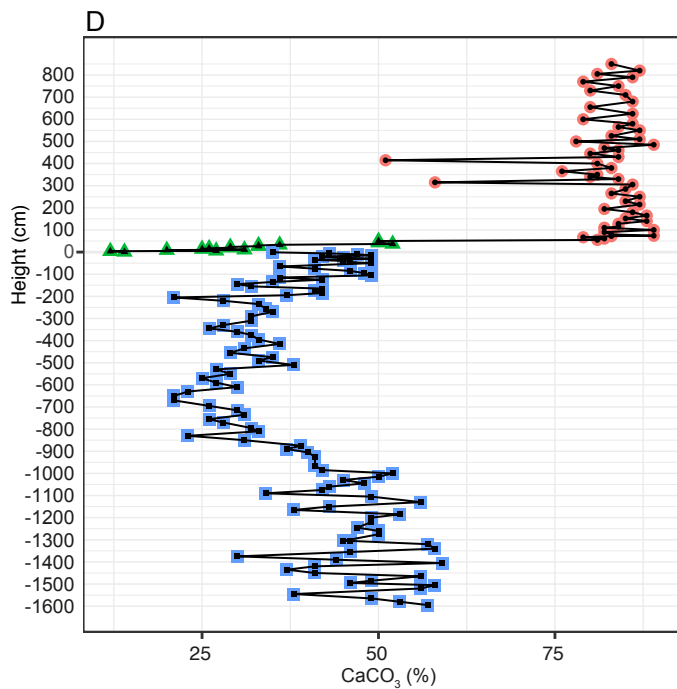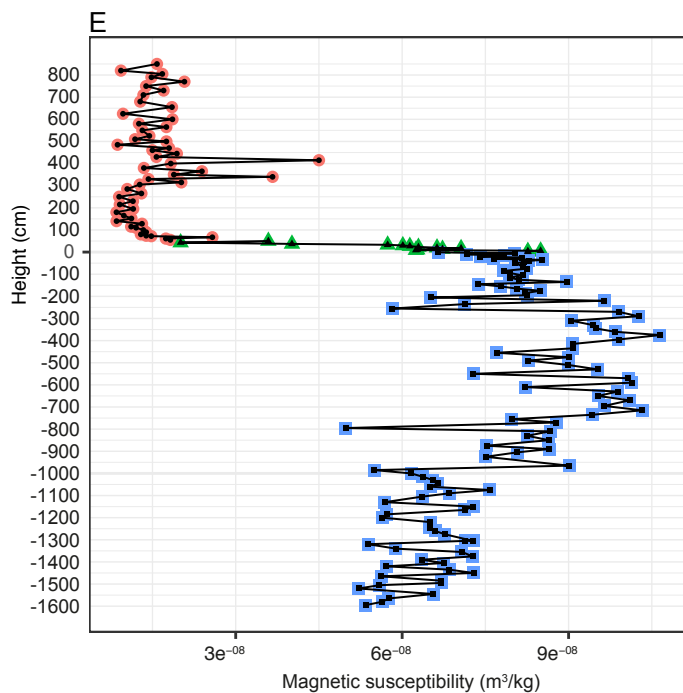

Supplement: Supplementary file 2 [file 2]

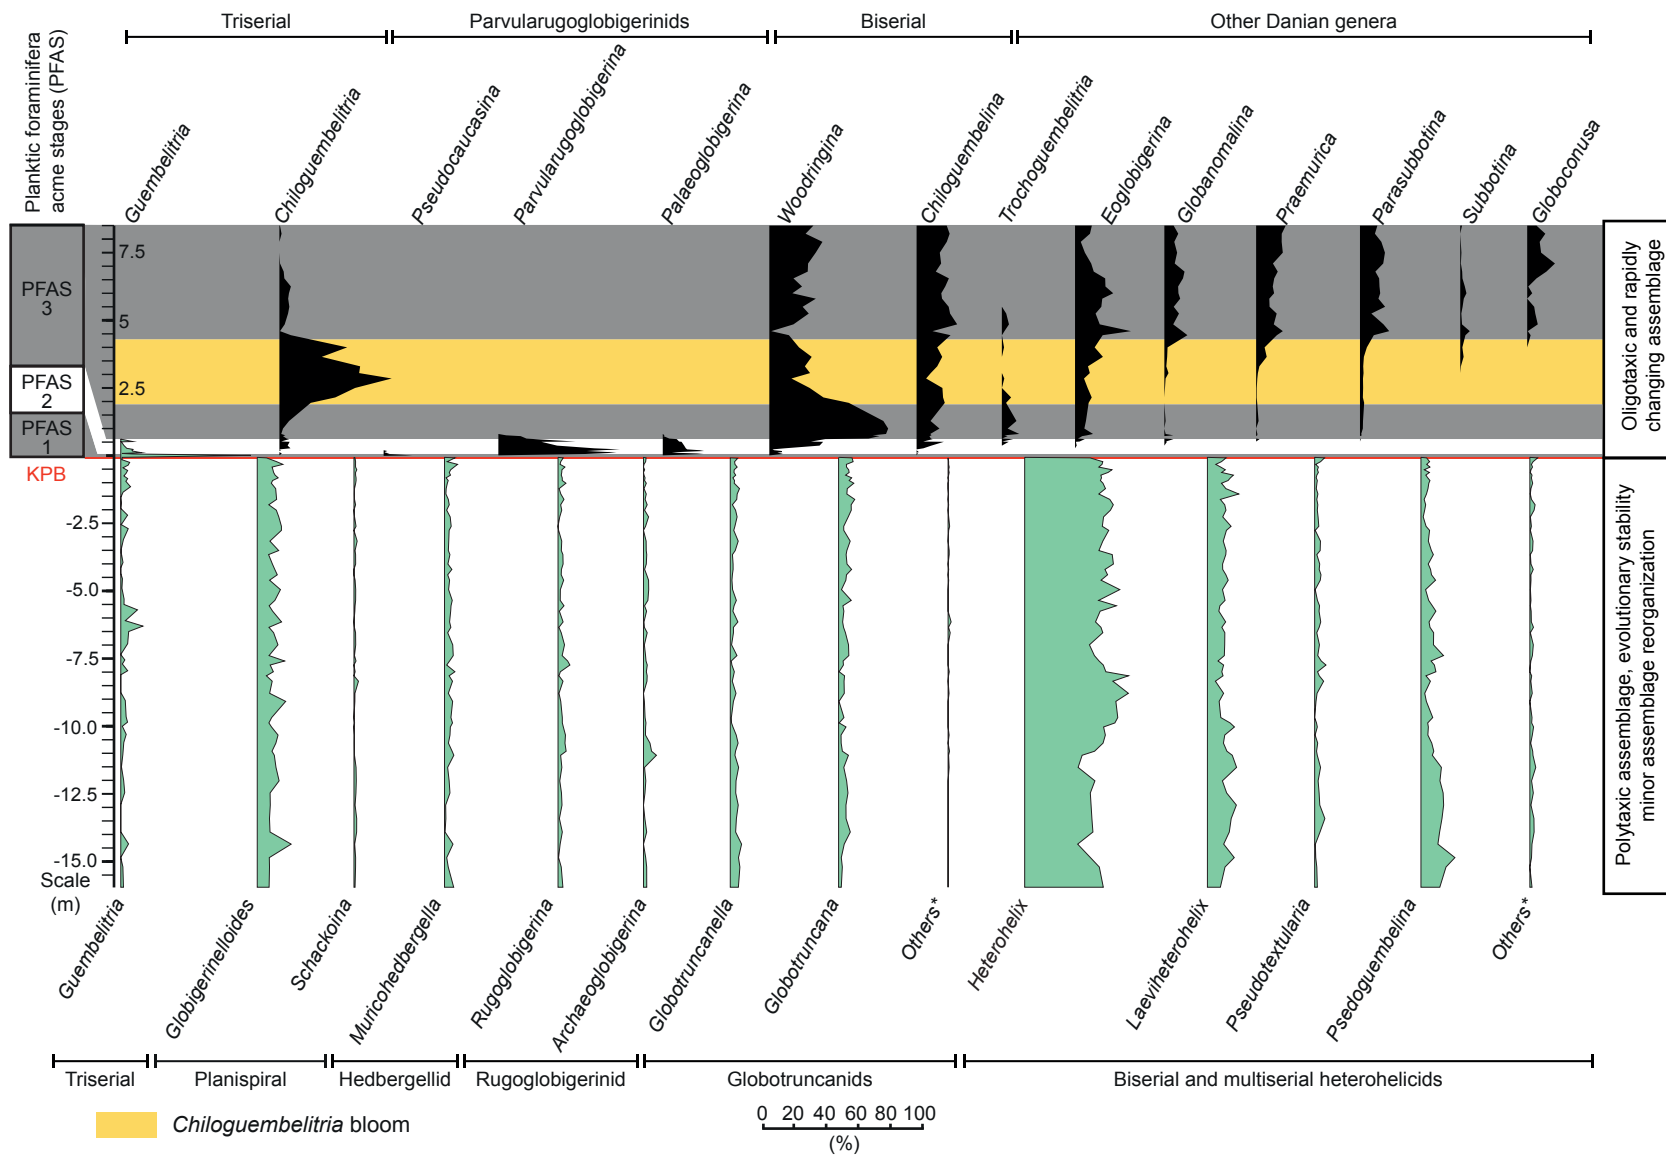

Supplement: Supplementary file 3 [file 2]

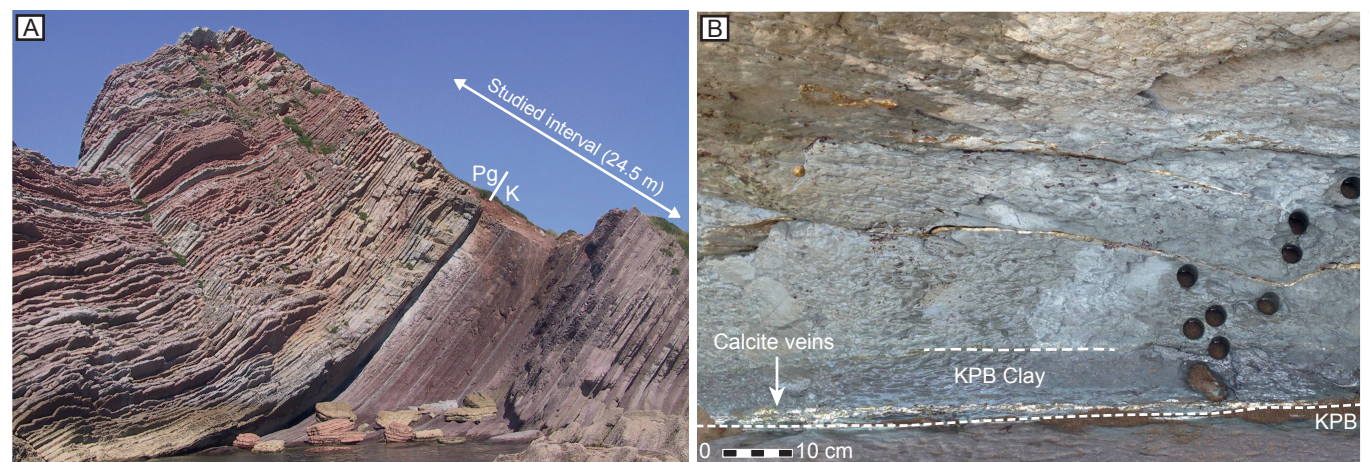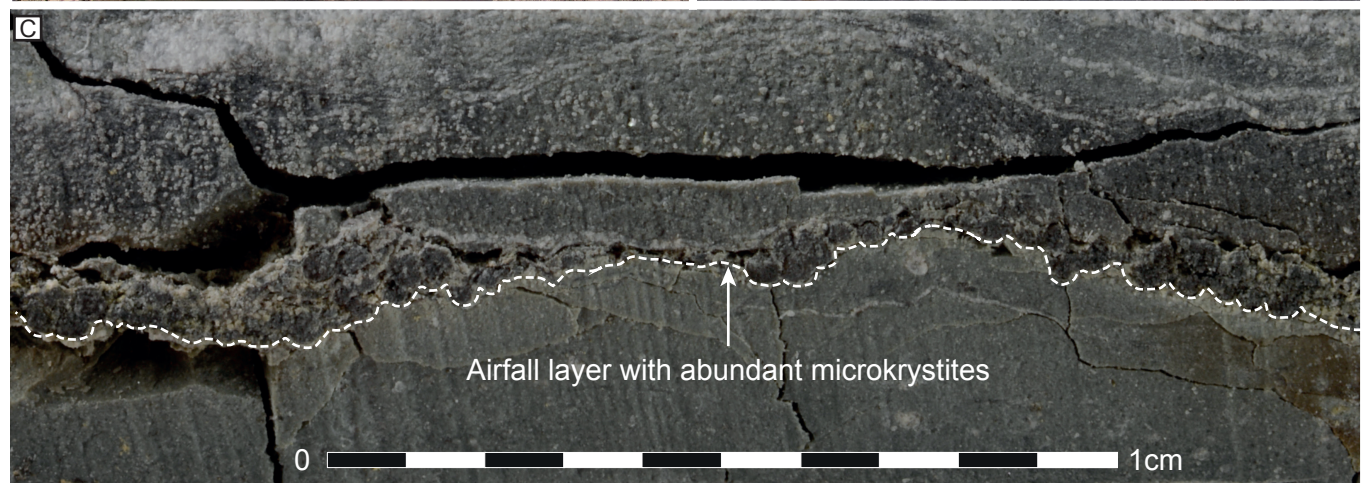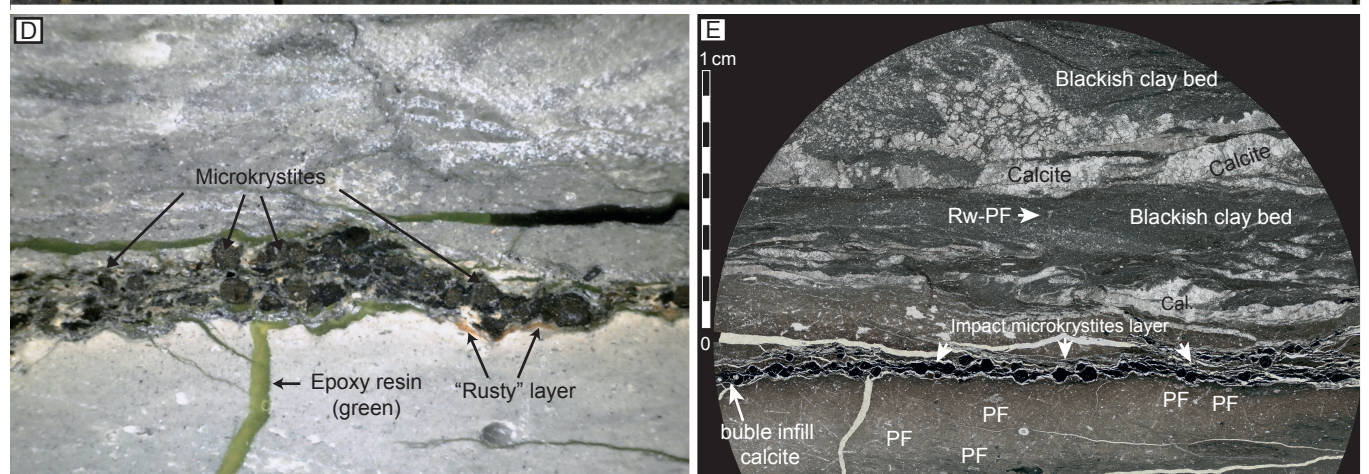

Supplement: Supplementary file 4 [file 2]

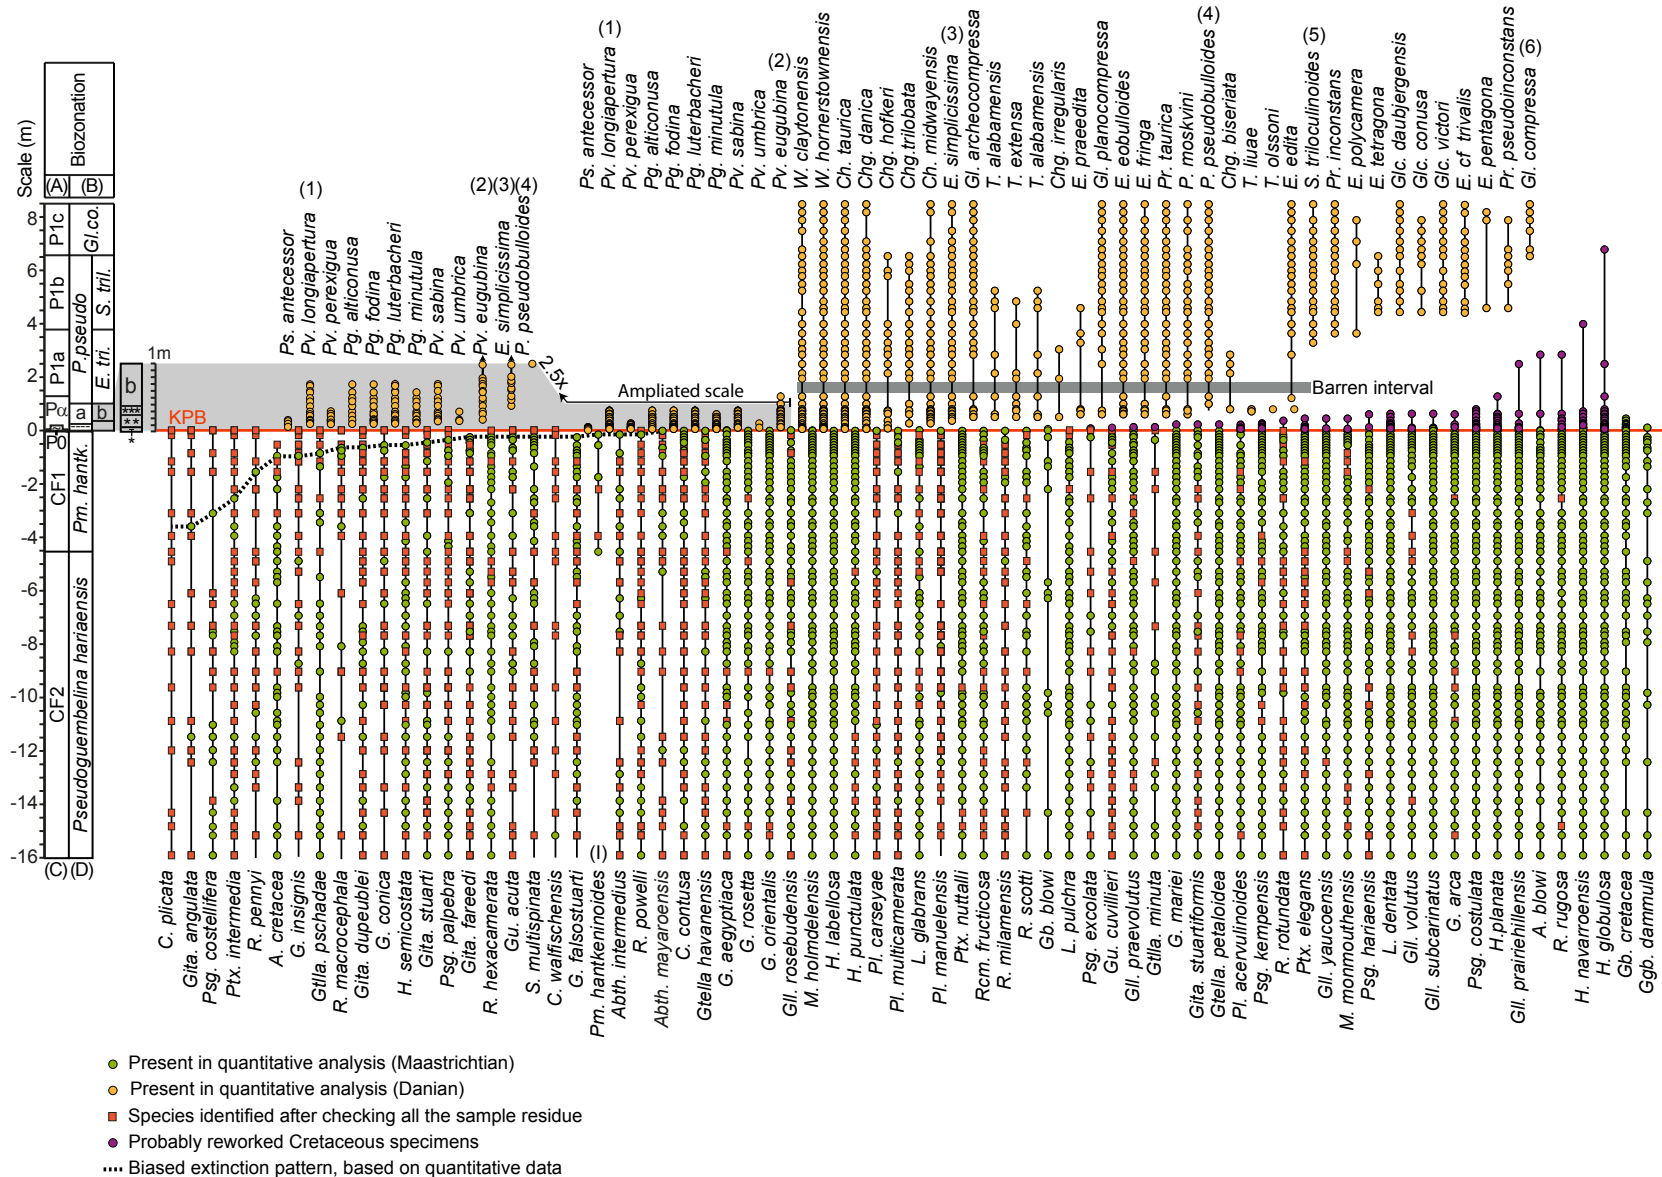

Supplement: Supplementary file 6 [file 2]
